# Supplementary material for: A cross-species alignment tool (CAT)
Source: Springer Nature journal article supplement (doi:10.1186/1471-2105-8-349), 2007-09-19

## Localized Alignment

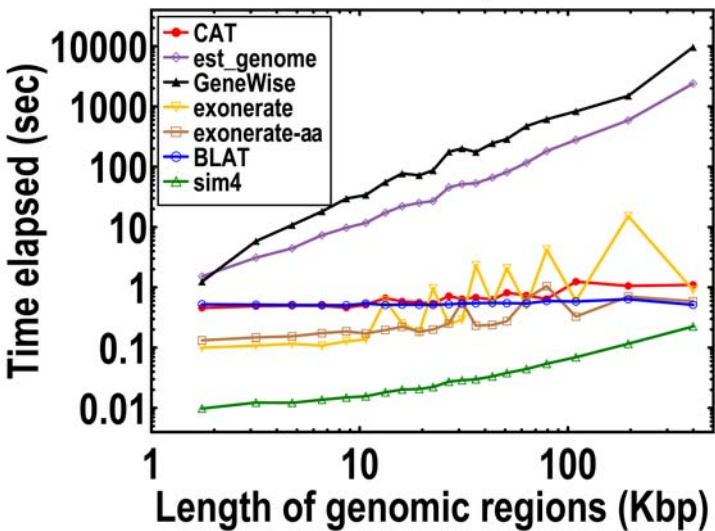

## Chromosome-wide Alignment

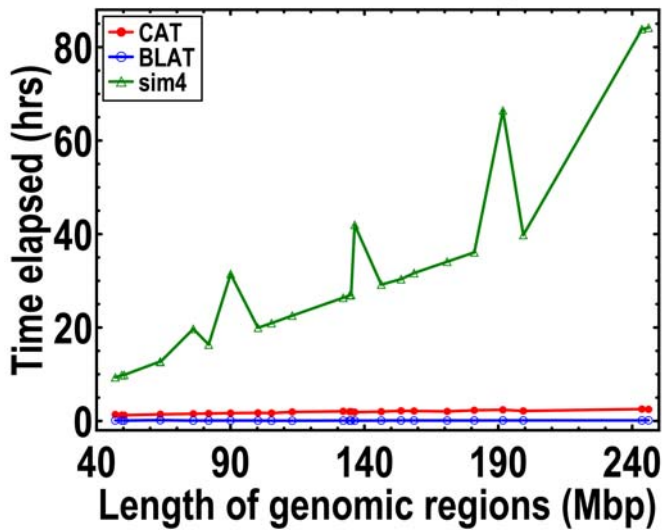

Supplement: 12859_2007_1721_MOESM2_ESM.pdf [file 12859_2007_1721_MOESM2_ESM.pdf]
